# Supplementary material for: Effects of Lactobacillus plantarum P10-R10, Lactobacillus salivarius P11-R11 and Lactobacillus reuteri DSM17938 on intestinal microbiota and plasma metabolism in mice with alcohol-related liver injury
Source: Research Square preprint supplement (doi:10.21203/rs.3.rs-6750503/v1), 2025-07-14
Supplement: Supplementary file 1 [file ee5eb2b4b934c390a3eb4694.docx]

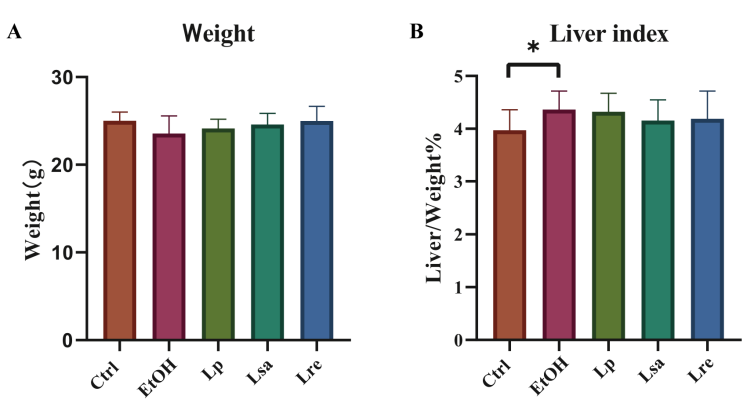


S.Figure 1 Weight and liver index of mice

* = P < 0.05, ** = P < 0.01, *** = P < 0.001, liver index = liver weight g/ body weight g*100%


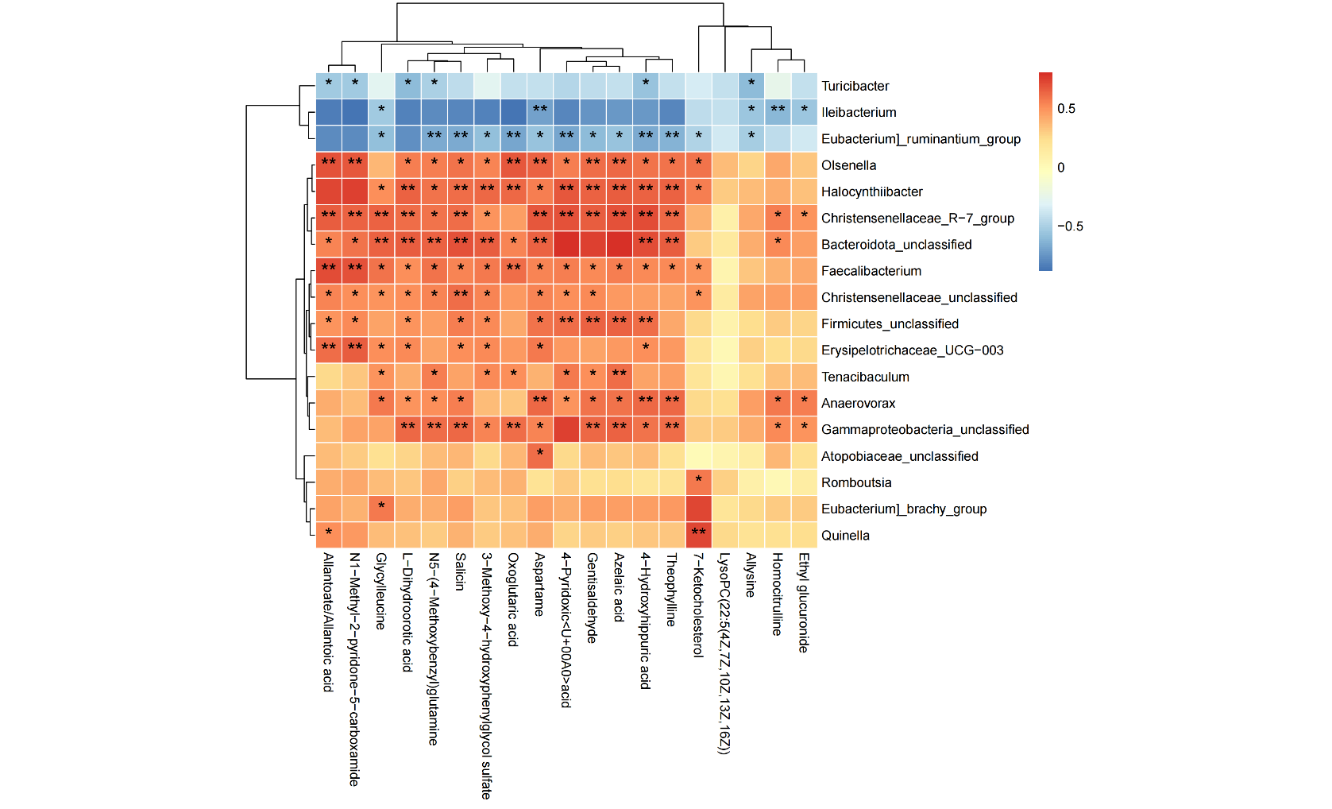


S.Figure 2 The correlation between the differential genera in the Lsa group and the plasma metabolites

The horizontal axis is the differential metabolites in plasma of the Lsa group, and the vertical axis is the changing genera of the Lp group. Red indicates a positive correlation, blue indicates a negative correlation, and the darker the color, the stronger the correlation. * represents P < 0.05, and ** represents P < 0.01.


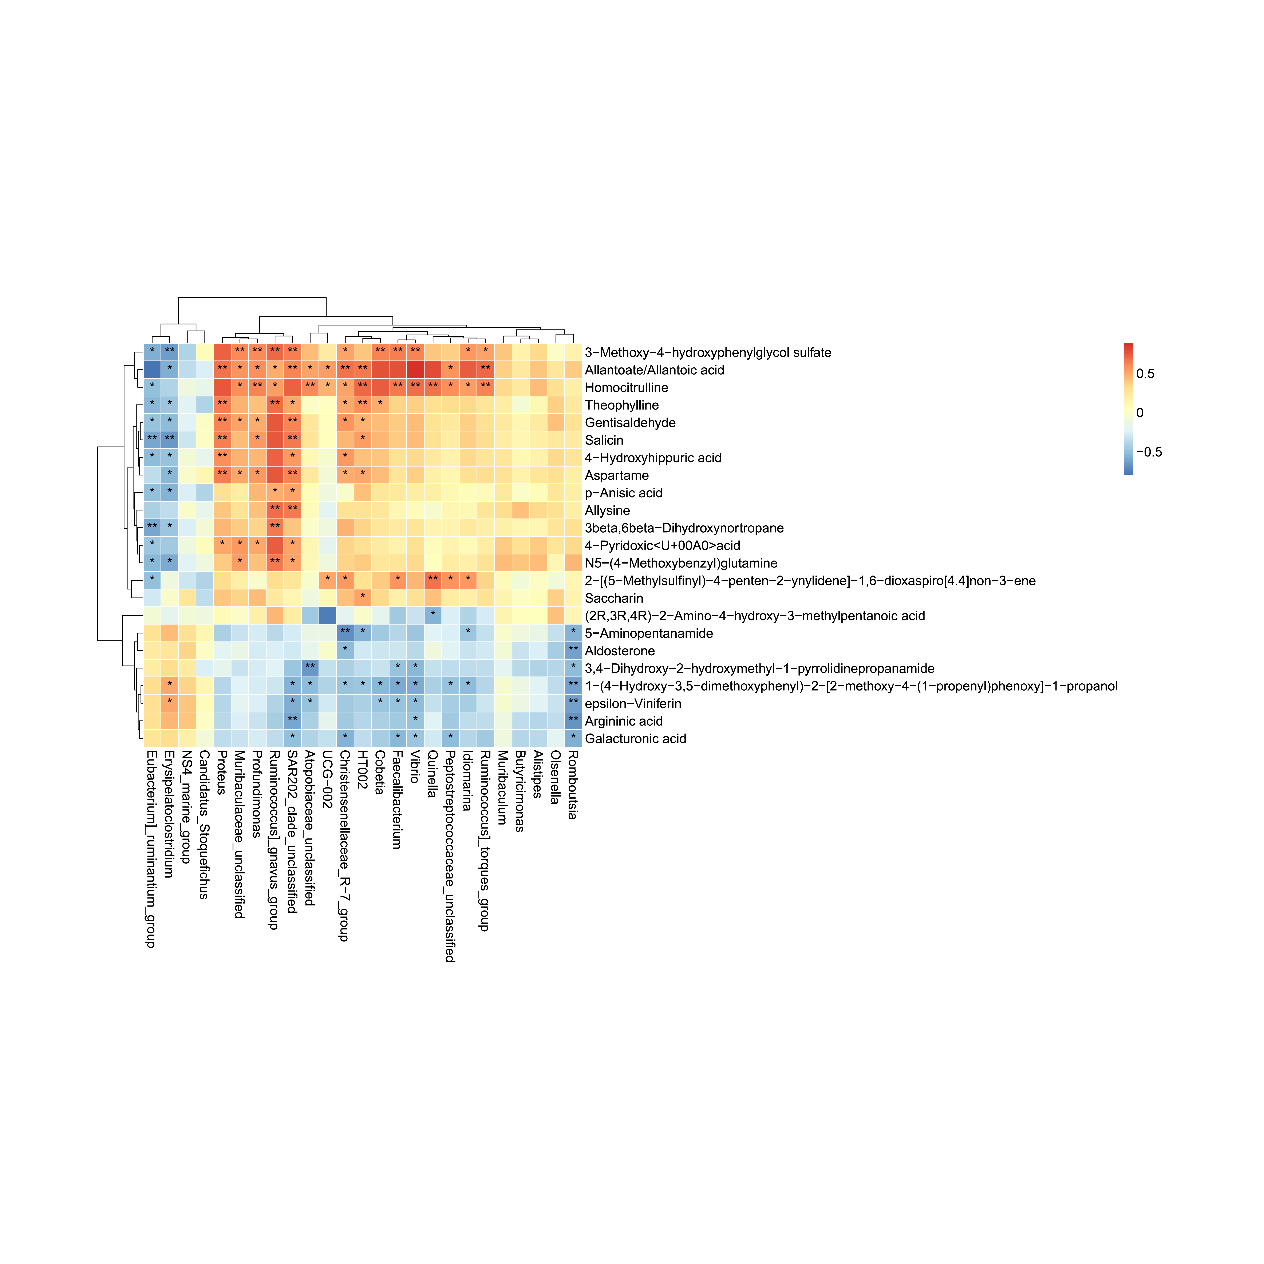


S.Figure 3 The correlation between the differential genera in the Lre group and the plasma metabolites

The horizontal axis is the differential metabolites in plasma of the Lre group, and the vertical axis is the changing genera of the Lp group. Red indicates a positive correlation, blue indicates a negative correlation, and the darker the color, the stronger the correlation. * represents P < 0.05, and ** represents P < 0.01.

S Table 1 The Effect of Lsa on the Gut Microbiota of Alcoholic Liver Injury Mice

| Genera with rising relative abundance | Genera with decreased relative abundance |
| --- | --- |
| *Halocynthiibacter* | *Ileibacterium* |
| *Faecalibacterium* | *Eubacterium]_ruminantium_group* |
| *Psychrobium* | *Turicibacter* |
| *Coriobacteriaceae_unclassified* | *Leucothrix* |
| *Idiomarina* | *SAR86_clade_unclassified* |
| *Olsenella* | *Paracoccus* |
| *Bacteroidota_unclassified* |  |
| *Quinella* |  |
| *Christensenellaceae_R-7_group* |  |
| *Butyricimonas* |  |
| *Gammaproteobacteria_unclassified* |  |
| *Cobetia* |  |
| *Eubacterium]_brachy_group* |  |
| *Campylobacterales_unclassified* |  |
| *Halovibrio* |  |
| *Firmicutes_unclassified* |  |
| *Muribaculaceae_unclassified* |  |
| *Bacteroides* |  |
| *Muribaculum* |  |
| *Dialister* |  |
| *Erysipelotrichaceae_UCG-003* |  |
| *Paludicola* |  |
| *Haematobacter* |  |
| *Tenacibaculum* |  |
| *Alloprevotella* |  |
| *HT002* |  |
| *Paramuribaculum* |  |
| *NK4A214_group* |  |
| *Romboutsia* |  |
| *Anaerovorax* |  |
| *Christensenellaceae_unclassified* |  |
| *Family_XIII_AD3011_group* |  |
| *Rubritalea* |  |
| *Atopobiaceae_unclassified* |  |
| *Aliivibrio* |  |

| Genera with rising relative abundance | Genera with decreased relative abundance |
| --- | --- |
| *Faecalibacterium* | *Eubacterium]_ruminantium_group* |
| *Vibrio* | *Erysipelatoclostridium* |
| *Cobetia* | *Candidatus_Stoquefichus* |
| *HT002* | *NS4_marine_group* |
| *Quinella* |  |
| *Idiomarina* |  |
| *Christensenellaceae_R-7_group* |  |
| *Muribaculaceae_unclassified* |  |
| *Proteus* |  |
| *Profundimonas* |  |
| *Butyricimonas* |  |
| *Ruminococcus]_torques_group* |  |
| *Olsenella* |  |
| *Peptostreptococcaceae_unclassified* |  |
| *Ruminococcus]_gnavus_group* |  |
| *UCG-002* |  |
| *Alistipes* |  |
| *Romboutsia* |  |
| *Muribaculum* |  |
| *Atopobiaceae_unclassified* |  |
| *SAR202_clade_unclassified* |  |

S Table 2 The Effect of Lre on the Gut Microbiota of Alcoholic Liver Injury Mice
